# Supplementary material
Source: PubMed Central journal article supplement (PMC6202181)
Supplement: NIHMS970899-supplement-Supplemental_PDF.pdf [file NIHMS970899-supplement-Supplemental_PDF.pdf]

# **SUPPLEMENTAL MATERIAL**

## **Supplemental Methods:**

### *Echocardiographic assessment:*

Echocardiography was performed according to American Society of Echocardiography guidelines and interpreted by Mayo staff cardiologists.<sup>1</sup> Left ventricular (LV) structure and geometry was assessed by LV end diastolic and systolic dimensions, LV septal and posterior wall thickness, and LV mass index. LV systolic function was assessed by ejection fraction. LV global longitudinal strain (a more sensitive measure of systolic function) was determined offline using commercial software as previously described (Syngo).<sup>2</sup> Early diastolic mitral inflow velocity (E), early diastolic mitral annular tissue velocity (e') and the E/e' ratio was used to assess LV diastolic function. Left atrial volume index was determined by the biplane method of disks. Right atrial pressure was estimated from the inferior vena caval diameter and its collapsibility with inspiration. Pulmonary artery systolic pressure was calculated as (4 x peak tricuspid regurgitation velocity) + estimated right atrial pressure.<sup>3</sup> Right ventricular (RV) dilation and dysfunction were reported based on qualitative visual estimation and graded nominally as present or absent.<sup>4,5</sup>

**Supplemental Table 1: Invasive Hemodynamic Findings**

|                                     | <u>Rest</u>        |                  |         | <u>Exercise</u>    |                  |         |
|-------------------------------------|--------------------|------------------|---------|--------------------|------------------|---------|
|                                     | Control<br>(n=147) | HFpEF<br>(n=267) | p value | Control<br>(n=147) | HFpEF<br>(n=267) | p value |
| <b><i>Vital Signs</i></b>           |                    |                  |         |                    |                  |         |
| Heart rate, bpm                     | 67±14              | 63±12            | 0.005   | 110±25             | 97±21            | <0.0001 |
| Systolic BP, mm Hg                  | 143±26             | 149±31           | 0.1     | 173±38             | 182±36           | 0.04    |
| Mean BP, mm Hg                      | 97±15              | 100±17           | 0.1     | 111±21             | 117±22           | 0.03    |
| <b><i>Central Hemodynamics</i></b>  |                    |                  |         |                    |                  |         |
| Right atrial pressure mm Hg         | 5±2                | 10±4             | <0.0001 | 7±4                | 19±8             | <0.0001 |
| PA mean pressure, mm Hg             | 17±4               | 26±8             | <0.0001 | 27±8               | 45±10            | <0.0001 |
| PASP, mmHg                          | 28±7               | 41±13            | <0.0001 | 43±13              | 64±16            | <0.0001 |
| PA wedge pressure, mm Hg            | 9±3                | 16±6             | <0.0001 | 14±5               | 31±6             | <0.0001 |
| Cardiac output, L/min               | 5.5±1.6            | 5.2±1.5          | 0.04    | 10.2±3.1           | 8.5±3.0          | <0.0001 |
| Cardiac index, L/min/m <sup>2</sup> | 2.9±0.8            | 2.6±0.6          | <0.0001 | 5.3±1.5            | 4.2±1.3          | <0.0001 |

Values are mean ± SD, %. bpm- beats per minute; BP-blood pressure; PA-Pulmonary artery; PASP-PA systolic pressure

**Supplemental Table 2: All Univariate predictors of HFpEF**

|                                                | <b>OR [95% CI]</b>  | <b>Beta estimate</b> | <b>AUC</b> | <b>Optimal Cut point</b> | <b>Sensitivity</b> | <b>Specificity</b> | <b>p value</b> |
|------------------------------------------------|---------------------|----------------------|------------|--------------------------|--------------------|--------------------|----------------|
| <b><u>Clinical</u></b>                         |                     |                      |            |                          |                    |                    |                |
| Age per year                                   | 1.08 [1.06-1.10]    | 0.08                 | 0.743      | 61                       | 80                 | 61                 | <0.0001        |
| Female                                         | 1.11 [0.74-1.68]    | 0.11                 | 0.513      | -                        | 61                 | 42                 | 0.6            |
| Body Mass Index per kg/m <sup>2</sup>          | 1.13 [1.09-1.18]    | 0.12                 | 0.703      | 30.5                     | 64                 | 68                 | <0.0001        |
| Elevated NTproBNP >125pg/ml                    | 3.74 [2.43-5.75]    | 3.74                 | 0.649      | -                        | 77                 | 53                 | <0.0001        |
| NT proBNP per pg/ml                            | 1.002 [1.001-1.003] | 0.0002               | 0.730      | 272                      | 60                 | 77                 | <0.0001        |
| Creatinine per mg/dl                           | 7.09 [3.10-16.24]   | 1.96                 | 0.628      | 1.2                      | 36                 | 85                 | <0.0001        |
| eGFR per ml/min/1.73m <sup>2</sup>             | 0.99 [0.98-0.99]    | -0.01                | 0.611      | 75                       | 46                 | 74                 | 0.0008         |
| Number of HTN drugs                            | 1.87 [1.58-2.22]    | 0.62                 | 0.720      | 1                        | 72                 | 63                 | <0.0001        |
| <b><u>EKG</u></b>                              |                     |                      |            |                          |                    |                    |                |
| 1 degree AV block                              | 1.92 [0.97-3.80]    | 0.65                 | 0.532      | -                        | 15                 | 92                 | 0.006          |
| QRS duration per ms                            | 1.01 [1.0001-1.02]  | 0.01                 | 0.499      | 134                      | 14                 | 95                 | 0.05           |
| PR interval per ms                             | 1.02 [1.01-1.03]    | 0.02                 | 0.644      | 160                      | 69                 | 56                 | <0.0001        |
| Left axis                                      | 2.03 [1.15-3.60]    | 0.71                 | 0.549      | -                        | 22                 | 88                 | 0.01           |
| Q wave                                         | 3.52 [1.54-8.08]    | 1.26                 | 0.557      | -                        | 17                 | 95                 | 0.0008         |
| ST-T abnormality                               | 3.05 [1.13-10.60]   | 1.12                 | 0.526      | -                        | 8                  | 93                 | 0.03           |
| QTc per ms                                     | 1.01 [1.005-1.02]   | 0.01                 | 0.594      | 431                      | 66                 | 51                 | 0.0008         |
| <b><u>Echocardiogram</u></b>                   |                     |                      |            |                          |                    |                    |                |
| LV End diastolic dimension per mm              | 1.03 [0.99-1.08]    | 0.03                 | 0.551      | 47                       | 66                 | 47                 | 0.1            |
| Ejection Fraction per %                        | 0.99 [0.96-1.03]    | -0.01                | 0.502      | 57                       | 17                 | 91                 | 0.7            |
| Left Atrial Volume Index per ml/m <sup>2</sup> | 1.09 [1.06-1.11]    | 0.08                 | 0.735      | 30                       | 75                 | 64                 | <0.0001        |

|                                                   |                  |       |       |    |    |    |         |
|---------------------------------------------------|------------------|-------|-------|----|----|----|---------|
| LV Mass Index per g/m <sup>2</sup>                | 1.02 [1.01-1.03] | 0.02  | 0.621 | 77 | 75 | 41 | <0.0001 |
| E/e' per unit                                     | 1.22 [1.16-1.30] | 0.20  | 0.744 | 9  | 79 | 57 | <0.0001 |
| Septal E' velocity per cm/s                       | 0.78 [0.71-0.86] | -0.25 | 0.654 | 7  | 64 | 60 | <0.0001 |
| Estimated RA pressure per mmHg                    | 1.31 [1.15-1.49] | 0.27  | 0.631 | 5  | 53 | 66 | <0.0001 |
| Pulmonary Artery Systolic Pressure per mmHg       | 1.13 [1.09-1.11] | 0.12  | 0.737 | 35 | 54 | 85 | <0.0001 |
| RV Fractional Area Change per %                   | 0.95 [0.92-0.98] | -0.05 | 0.605 | 48 | 39 | 88 | 0.0002  |
| Tricuspid Annular Plane Systolic Excursion per mm | 0.87 [0.81-0.93] | -0.14 | 0.656 | 21 | 49 | 80 | <0.0001 |
| Global LV Longitudinal strain per %               | 0.87 [0.81-0.94] | -0.14 | 0.614 | 16 | 62 | 56 | 0.0001  |

**Clinically relevant or current**

**guideline based partition values**

|                                                   |                   |      |       |   |    |    |         |
|---------------------------------------------------|-------------------|------|-------|---|----|----|---------|
| Left Atrial Volume Index >34 ml/m <sup>2</sup>    | 4.78 [2.92-7.81]  | 1.56 | 0.662 | - | 49 | 83 | <0.0001 |
| E/e' >9                                           | 5.23 [3.37-8.11]  | 1.65 | 0.687 | - | 78 | 59 | <0.0001 |
| E/e' >10                                          | 4.78 [3.07-7.44]  | 1.56 | 0.684 | - | 63 | 73 | <0.0001 |
| E/e' >13                                          | 5.20 [3.09-8.76]  | 1.65 | 0.661 | - | 46 | 86 | <0.0001 |
| E/e' >14                                          | 5.06 [2.85-8.99]  | 1.62 | 0.637 | - | 38 | 89 | <0.0001 |
| NT proBNP > 125 pg/ml                             | 3.74 [2.44-5.78]  | 1.32 | 0.649 | - | 77 | 53 | <0.0001 |
| Global LV longitudinal strain <18%                | 1.48 [0.87-2.52]  | 0.39 | 0.528 | - | 86 | 20 | 0.2     |
| Global LV longitudinal strain <16%                | 2.10 [1.39-3.16]  | 0.74 | 0.591 | - | 62 | 56 | 0.0004  |
| Tricuspid Annular Plane Systolic Excursion <16 mm | 7.16 [1.67-30.74] | 1.97 | 0.538 | - | 9  | 99 | 0.0008  |

eGFR-estimated glomerular filtration rate; HTN-Hypertension; LV-Left Ventricle; RA-Right Atrial; RV-Right Ventricle; NT-proBNP –N terminal pro Brain Natriuretic Peptide

**Supplemental Table 3: Incremental value of H<sub>2</sub>FpEF score**

|                                                | OR [95% CI]                       | AUC [95% CI]                         | AICc         | AUC comparison               | p value  | Optimal cutpoint | Sensitivity  | Specificity  | LR+         | LR-         |
|------------------------------------------------|-----------------------------------|--------------------------------------|--------------|------------------------------|----------|------------------|--------------|--------------|-------------|-------------|
| <b><u>Derivation cohort (n=414)</u></b>        |                                   |                                      |              |                              |          |                  |              |              |             |             |
| ESC 2007 algorithm                             | 5.00<br>[3.24-7.85]               | 0.690<br>[0.642-0.734]               | 486.5        | -0.173<br>[-0.215 to -0.132] | <0.0001  | NA               | 65.17        | 72.79        | 2.40        | 0.48        |
| ESC 2016 algorithm                             | 4.57<br>[2.92-7.29]               | 0.672<br>[0.626-0.716]               | 495.0        | -0.169<br>[-0.120 to -0.217] | <0.0001  | NA               | 56.93        | 77.55        | 2.54        | 0.56        |
| CART model                                     | --                                | 0.886<br>[0.812-0.960]               | --           | +0.044<br>[0.017, 0.724]     | 0.002    | NA               | 91.76        | 70.75        | 3.14        | 0.12        |
| <b>H<sub>2</sub>FpEF score</b>                 | <b>1.98</b><br><b>[1.73-2.30]</b> | <b>0.841</b><br><b>[0.798-0.876]</b> | <b>386.7</b> | <b>Reference</b>             | <b>-</b> | <b>4</b>         | <b>76.03</b> | <b>78.23</b> | <b>3.49</b> | <b>0.31</b> |
| HFpEF score<br>(continual scale)               | -                                 | 0.863<br>[0.824-0.894]               | 370.0        | +0.022<br>[+0.002 to +0.042] | 0.03     | NA               | -            | -            | -           | -           |
| <b><u>Test (Validation) cohort (n=100)</u></b> |                                   |                                      |              |                              |          |                  |              |              |             |             |
| ESC 2007 algorithm                             | 6.33<br>[2.07-22.44]              | 0.708<br>[0.585-0.807]               | 77.9         | -0.224<br>[-0.343 to -0.106] | 0.0002   | NA               | 62.50        | 79.17        | 3.00        | 0.47        |
| ESC 2016 algorithm                             | 7.62<br>[2.29-34.94]              | 0.679<br>[0.584-0.762]               | 96.0         | -0.207<br>[-0.103 to -0.310] | <0.0001  | NA               | 45.83        | 90.00        | 4.58        | 0.60        |
| CART Model                                     | --                                | 0.852<br>[0.749-0.917]               | --           | -0.034<br>[-0.065 to -0.003] | 0.03     | NA               | 83.93        | 72.73        | 3.08        | 0.22        |
| <b>H<sub>2</sub>FpEF Score</b>                 | <b>2.26</b><br><b>[1.69-3.26]</b> | <b>0.886</b><br><b>[0.789-0.941]</b> | <b>81.6</b>  | <b>Reference</b>             | <b>-</b> | <b>4</b>         | <b>78.18</b> | <b>83.78</b> | <b>4.82</b> | <b>0.26</b> |
| HFpEF score<br>(continual scale)               | -                                 | 0.910<br>[0.819-0.957]               | -            | +0.024<br>[-0.006 to +0.053] | 0.1      | NA               | -            | -            | -           | -           |

ESC-European Society of Cardiology, CART-Classification and Regression Tree, LR-Likelihood Ratio, rest as above

**Supplemental Table 4: Sensitivity Analysis Using Agnostic Logistic Model to Predict HFpEF**

| <b><i>Agnostic Multivariable model including all significant univariate predictors</i></b><br><b><i>(AICc=388.38) AUC-0.871, &lt;0.0001</i></b> | <b>OR [95% CI]</b> | <b>Beta estimate</b> | <b>p value</b> |
|-------------------------------------------------------------------------------------------------------------------------------------------------|--------------------|----------------------|----------------|
| Body Mass Index>30 kg/m <sup>2</sup>                                                                                                            | 3.22 [1.80-5.76]   | 1.17                 | <0.0001        |
| Left atrial volume index>30 ml/m <sup>2</sup>                                                                                                   | 1.58 [0.86-2.90]   | 0.46                 | 0.1            |
| NT proBNP>275 pg/ml                                                                                                                             | 1.00 [0.49-2.02]   | -0.01                | 0.9            |
| Global Longitudinal Strain<16%                                                                                                                  | 0.88 [0.50-1.55]   | -0.1                 | 0.6            |
| Age>60 years                                                                                                                                    | 2.08 [1.13-3.81]   | 0.73                 | 0.02           |
| Chronic kidney disease stage 3 or greater                                                                                                       | 1.68 [0.72-3.94]   | 0.52                 | 0.2            |
| Diabetes or prediabetes                                                                                                                         | 1.64 [0.94-2.87]   | 0.50                 | 0.08           |
| Pacemaker                                                                                                                                       | 3.74 [0.40-34.92]  | 1.32                 | 0.2            |
| Treatment with 2 or more antihypertensives                                                                                                      | 1.84 [1.06-3.20]   | 0.61                 | 0.03           |
| Cardiomegaly on X ray                                                                                                                           | 2.33 [0.84-6.50]   | 0.85                 | 0.09           |
| Pleural effusion on X ray                                                                                                                       | 1.01 [0.15-6.69]   | 0.01                 | 0.9            |
| Left ventricular hypertrophy                                                                                                                    | 0.88 [0.42-1.85]   | -0.12                | 0.7            |
| E/e' ratio>9                                                                                                                                    | 1.85 [1.04-3.29]   | 0.62                 | 0.04           |
| Pulmonary Artery Systolic Pressure>35 mmHg                                                                                                      | 1.33 [0.68-2.61]   | 0.29                 | 0.4            |
| RV Fractional Area Change<48%                                                                                                                   | 3.36 [1.66-6.81]   | 1.21                 | 0.0004         |
| Tricuspid Annular Plane Systolic Excursion<21 mm                                                                                                | 1.49 [0.75-2.99]   | 0.40                 | 0.3            |
| Atrial Fibrillation                                                                                                                             | 2.97 [1.04-8.51]   | 1.09                 | 0.03           |
| <b><i>Agnostic stepwise backward regression</i></b><br><b><i>(AICc=380.91), AUC-0.857, &lt;0.0001</i></b>                                       | <b>OR [95% CI]</b> | <b>Beta estimate</b> | <b>p value</b> |
| Body Mass Index>30 kg/m <sup>2</sup>                                                                                                            | 3.29 [1.95-5.56]   | 1.19                 | <0.0001        |
| Atrial Fibrillation                                                                                                                             | 5.72 [2.25-14.56]  | 1.74                 | <0.0001        |
| Age>60 years                                                                                                                                    | 2.91 [1.69-5.02]   | 1.07                 | 0.0001         |

|                               |                  |      |       |
|-------------------------------|------------------|------|-------|
| 2 or more antihypertensives   | 2.13 [1.26-3.59] | 0.75 | 0.005 |
| E/e' <sup>&gt;</sup> 9        | 2.29 [1.34-3.93] | 0.77 | 0.005 |
| RV Fractional Area Change<48% | 3.82 [1.98-7.39] | 0.72 | 0.02  |

AICc- Akaike information criterion; AUC-Area Under the Curve; OR-Odds ratio; CI-Confidence Interval; NT-proBNP –N terminal pro Brain Natriuretic Peptide; RV-Right Ventricle



**Supplemental Table 5: Baseline characteristics of test cohort:**

|                                          | <b>Non-Cardiac<br/>Dyspnea<br/>(n=39)</b> | <b>HFpEF<br/>(n=61)</b> | <b>p value</b> |
|------------------------------------------|-------------------------------------------|-------------------------|----------------|
| Age, years                               | 53 ± 13                                   | 70 ± 10                 | <0.0001        |
| Female, %                                | 49                                        | 51                      | 0.8            |
| Body mass index, kg/m <sup>2</sup>       | 27.9 ± 6.0                                | 33.0 ± 8.9              | 0.002          |
| <b>Comorbidities</b>                     |                                           |                         |                |
| Number of anti-hypertensive drugs, n     | 0.9 ± 1.1                                 | 2.4 ± 1.3               | <0.0001        |
| Impaired glucose tolerance any, %        | 33                                        | 56                      | 0.04           |
| Atrial Fibrillation any, %               | 8                                         | 39                      | 0.0002         |
| Paroxysmal Atrial Fibrillation, %        | 8                                         | 23                      |                |
| Permanent Atrial Fibrillation, %         | 0                                         | 16                      |                |
| NT-proBNP, pg/ml                         | 61 [28.75-128.5]                          | 237.5 [102.5-817]       | 0.02           |
| <b>Echocardiography</b>                  |                                           |                         |                |
| LV end diastolic dimension, mm           | 47 ± 5                                    | 50 ± 6                  | 0.1            |
| LV mass index, g/m <sup>2</sup>          | 82 ± 21                                   | 98 ± 30                 | 0.02           |
| LV hypertrophy, %                        | 10                                        | 35                      | 0.008          |
| LA volume index, ml/m <sup>2</sup>       | 26 ± 9                                    | 38 ± 16                 | <0.0001        |
| E/e' ratio                               | 8 ± 3                                     | 16 ± 9                  | <0.0001        |
| Septal e', cm/s                          | 8 ± 3                                     | 6 ± 2                   | <0.0001        |
| Pulmonary artery systolic pressure, mmHg | 26 ± 7                                    | 35 ± 12                 | 0.0002         |

## Supplemental References

1. Lang RM, Badano LP, Mor-Avi V, Afilalo J, Armstrong A, Ernande L, Flachskampf FA, Foster E, Goldstein SA, Kuznetsova T, Lancellotti P, Muraru D, Picard MH, Rietzschel ER, Rudski L, Spencer KT, Tsang W, Voigt JU. Recommendations for cardiac chamber quantification by echocardiography in adults: an update from the American Society of Echocardiography and the European Association of Cardiovascular Imaging. *Eur Heart J Cardiovasc Imaging*. 2015;16:233-70.
2. Obokata M, Reddy YN, Pislaru SV, Melenovsky V, Borlaug BA. Evidence Supporting the Existence of a Distinct Obese Phenotype of Heart Failure with Preserved Ejection Fraction. *Circulation*. 2017;136:6-19.
3. Rudski LG, Lai WW, Afilalo J, Hua L, Handschumacher MD, Chandrasekaran K, Solomon SD, Louie EK, Schiller NB. Guidelines for the echocardiographic assessment of the right heart in adults: a report from the American Society of Echocardiography endorsed by the European Association of Echocardiography, a registered branch of the European Society of Cardiology, and the Canadian Society of Echocardiography. *J Am Soc Echocardiogr*. 2010;23:685-713; quiz 86-8.
4. Bleeker GB, Steendijk P, Holman ER, Yu CM, Breithardt OA, Kaandorp TA, Schalij MJ, van der Wall EE, Nihoyannopoulos P, Bax JJ. Assessing right ventricular function: the role of echocardiography and complementary technologies. *Heart*. 2006;92 Suppl 1:i19-26.
5. Mohammed SF, Hussain I, AbouEzzedine OF, Takahama H, Kwon SH, Forfia P, Roger VL, Redfield MM. Right ventricular function in heart failure with preserved ejection fraction: a community-based study. *Circulation*. 2014;130:2310-20.

## Supplemental Figure Legends:

**Supplemental Figure 1A:** 2016 European Society of Cardiology diagnostic criteria for Heart Failure with Preserved Ejection Fraction. HF-heart failure, NT-proBNP- N terminal pro Brain Natriuretic Peptide, BNP-Brain Natriuretic Peptide, LA-Left Atrium, LVMI - Left Ventricular Mass Index,  $E/e'$  –ratio of early diastolic mitral inflow velocity to septal mitral annulus tissue relaxation velocity

**Supplemental Figure 1B:** 2007 European Society of Cardiology modified non-invasive diagnostic criteria for Heart Failure with Preserved Ejection Fraction

**Supplemental Figure 2:** Nomogram for the prediction of the probability of HFpEF based on a logistic regression model with continuous variables as shown on the figure. The predicted probability for HFpEF can be obtained by drawing a vertical line up from each variable at the value for a patient to the “Points” line. The total points is the sum of the point values for the five variables including the model. The predicted probability is determined by drawing a vertical line down from the “Total Points” line to the probability line at the bottom of the figure. For example, a 60 year old person (34 points) with BMI of 35 (40 points), without AFib (0 points),  $E/e'$  of 5 (8 points) and pulmonary artery systolic pressure of 50 (40 points), has a total of 122 points. The predicted probability of HFpEF is then estimated to be between 0.70 and 0.90.

**Supplemental Figure 3:** Continuous HFPEF score calibration by deciles of predicted probability (X axis) indicating good calibration. The Hosmer-Lemeshow goodness of fit test results using deciles of predicted probabilities were  $p=0.12$ ,  $0.31$ , and  $0.32$  for the derivation, validation and pooled overall sample, respectively, indicating support for a properly calibrated model.

**Supplemental Figure 4:** Classification and Regression Tree (CART) Analysis to Diagnose HFpEF. AFib-Atrial Fibrillation, PASP-Pulmonary Artery Systolic Pressure, BMI-Body Mass Index,  $E/e'$  - ratio of early diastolic mitral inflow velocity to septal mitral annulus tissue relaxation velocity, NT-proBNP- N terminal pro Brain Natriuretic Peptide

The tree structure represents a non-parametric branching algorithm for whether or not a person would be predicted to have HFpEF based on the variables and thresholds presented in the tree. The shaded boxes (terminal nodes) along the bottom edge of the figure are shaded to represent the predicted probability that a person has HFpEF with darker shades indicating higher probability.

The top entry in each terminal node represents the predicted classification for that node. The second line reports the empirical probability of each classification level, not HFpEF and HFpEF, respectively. The final row in the cell gives the percentage of the development sample ( $n=414$ ) that is classified into the node.

To illustrate the use of the tree more specifically, consider a person less than 60 years of age with a BMI of  $25 \text{ kg/m}^2$ . If that person has a NT-proBNP result under  $130 \text{ pg/ml}$ , he or she would be classified as not having HFpEF. In the  $38/414$  (9%) of the sample that were in this node, 97% (37/38) of them did not have HFpEF and were correctly classified accordingly. The false positive rate for this node was 3% (1/38). If this person

had an NT-proBNP result  $\geq 130$  pg/ml, the use of the PASP would be needed to further classify the individual as indicated in the tree.

**Supplemental Figure 5:** Calibration of H<sub>2</sub>FpEF score in A) local patients not referred from tertiary academic medical centers, B) Early HFpEF (elevation in filling pressure during exercise only) and C) Advanced HFpEF (elevation in filling pressures at rest and during exercise).

# European Society of Cardiology HFpEF criteria

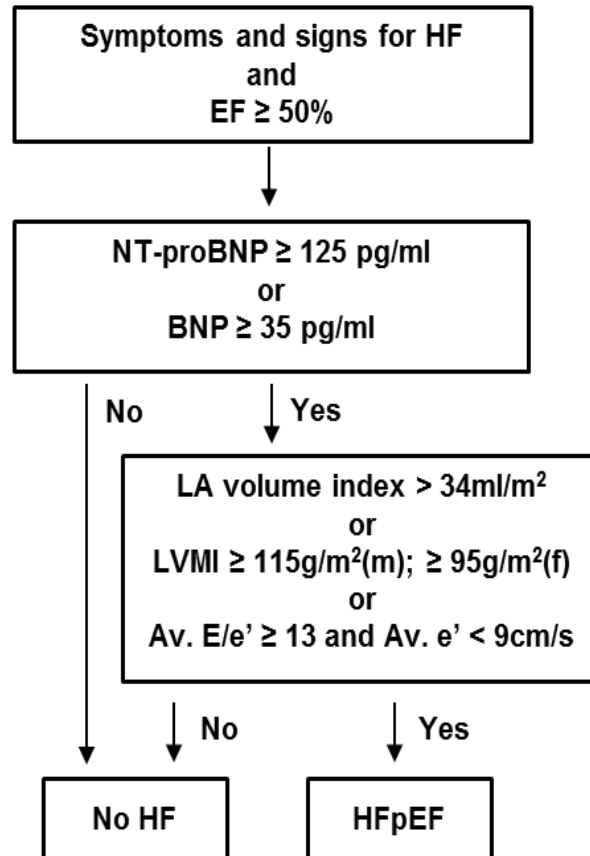

Supplemental Figure 1a: ESC 2016 algorithm for HFpEF diagnosis

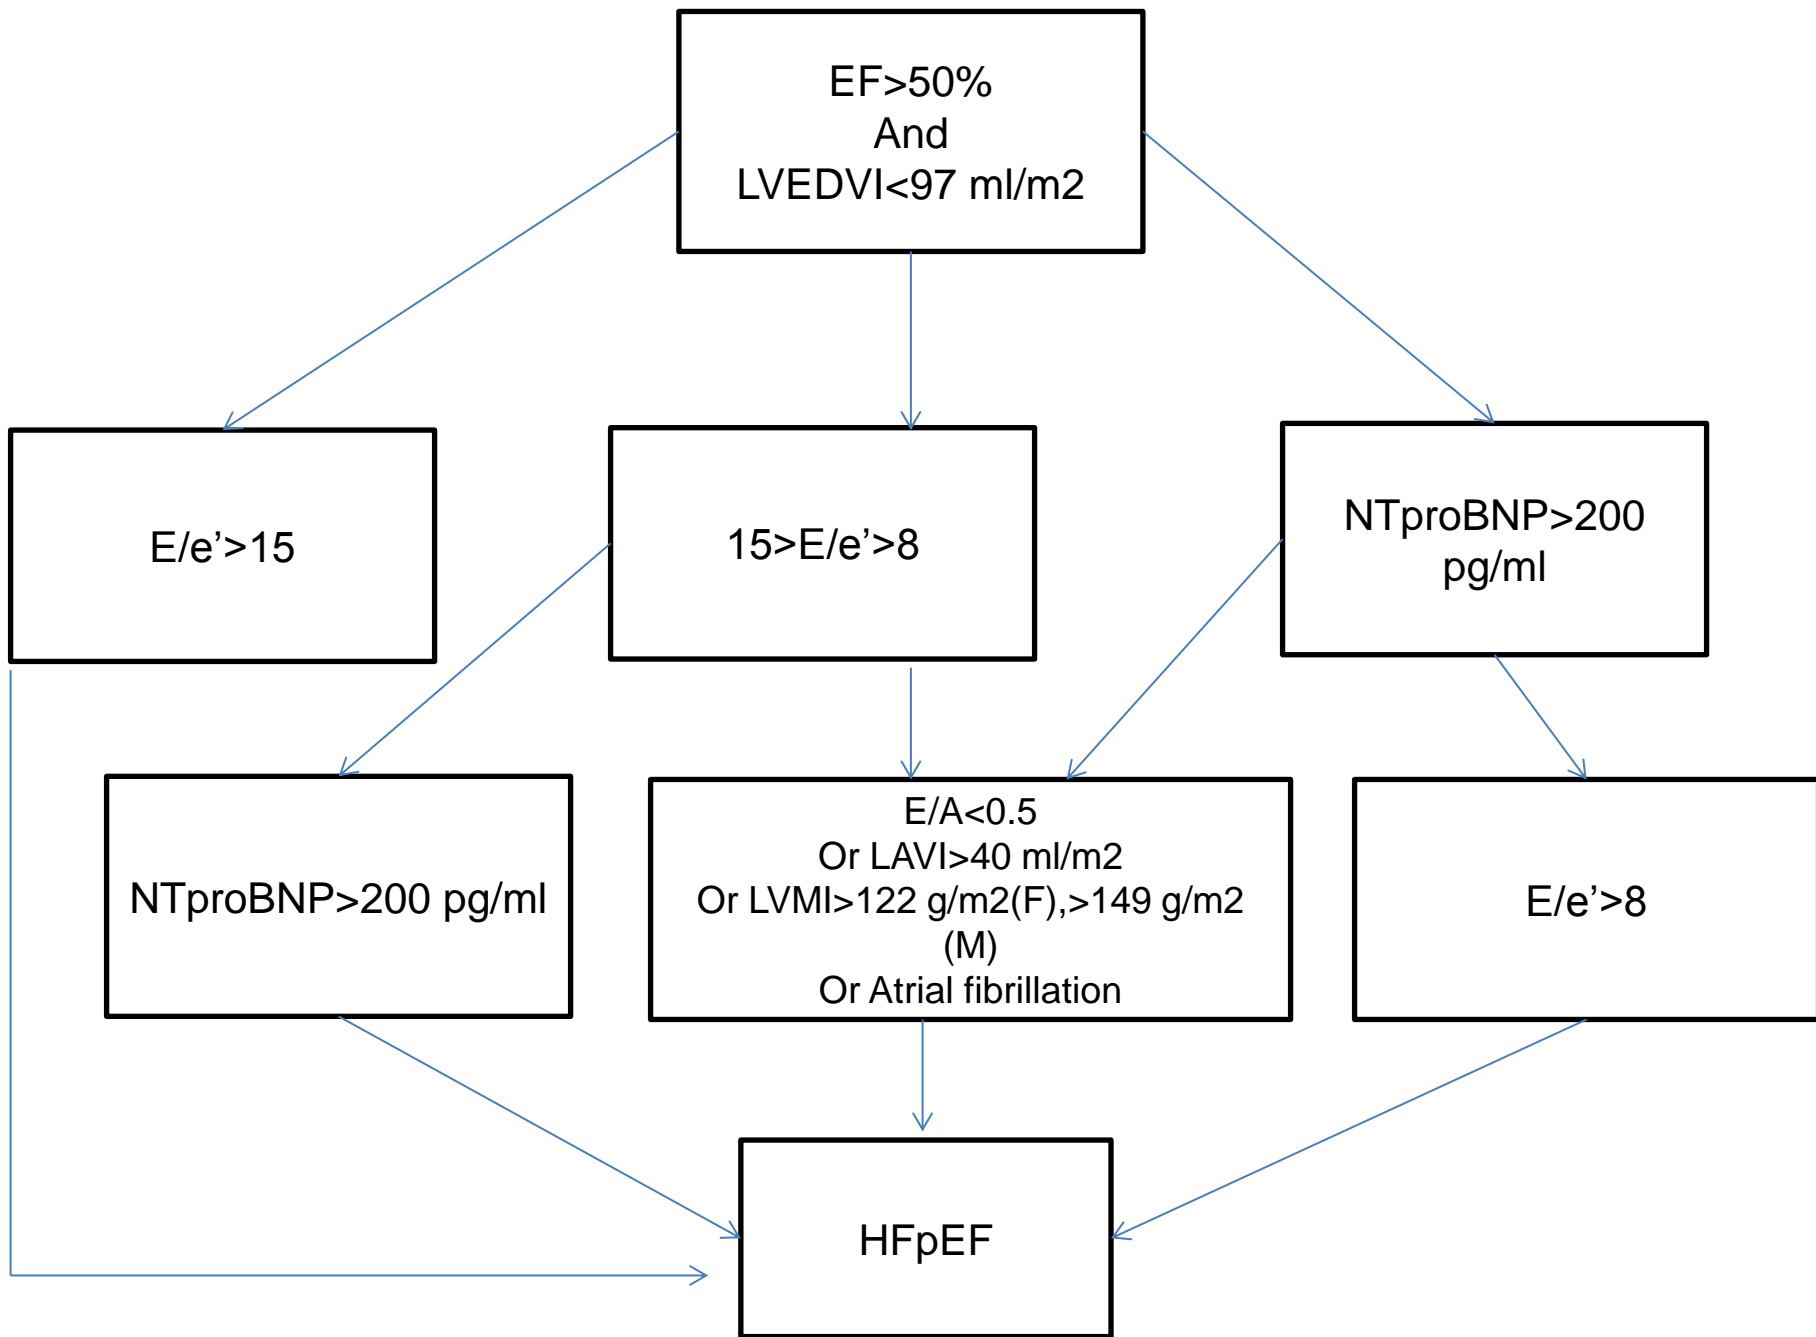

Supplemental Figure 1b: ESC 2007 algorithm for HFpEF diagnosis

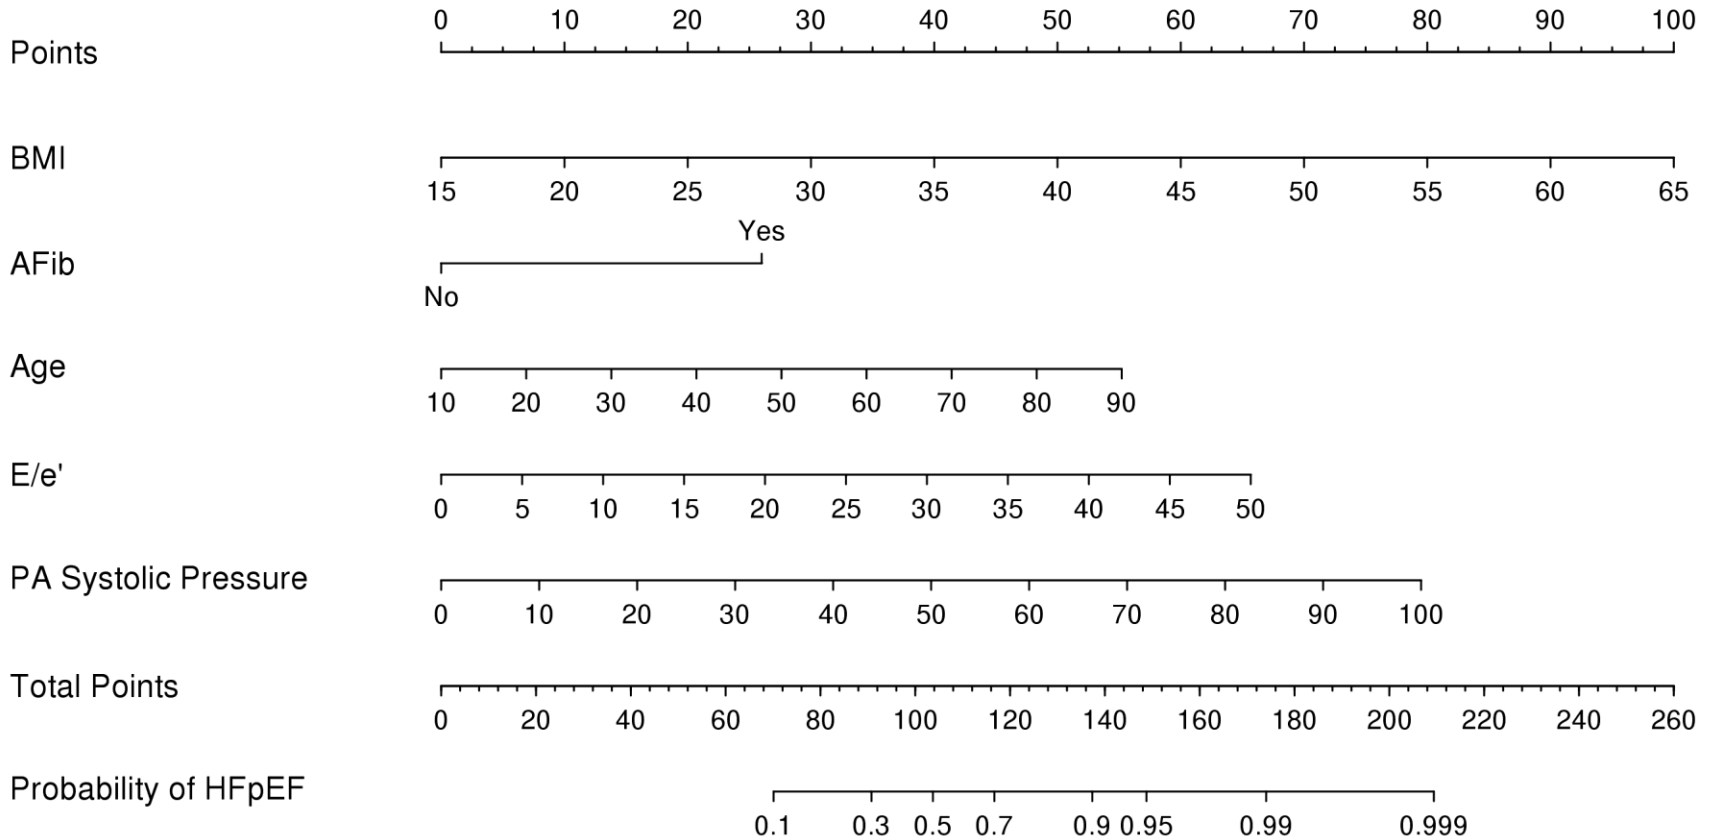

Supplemental Figure 2: Nomogram to diagnose HFpEF using continuous variables

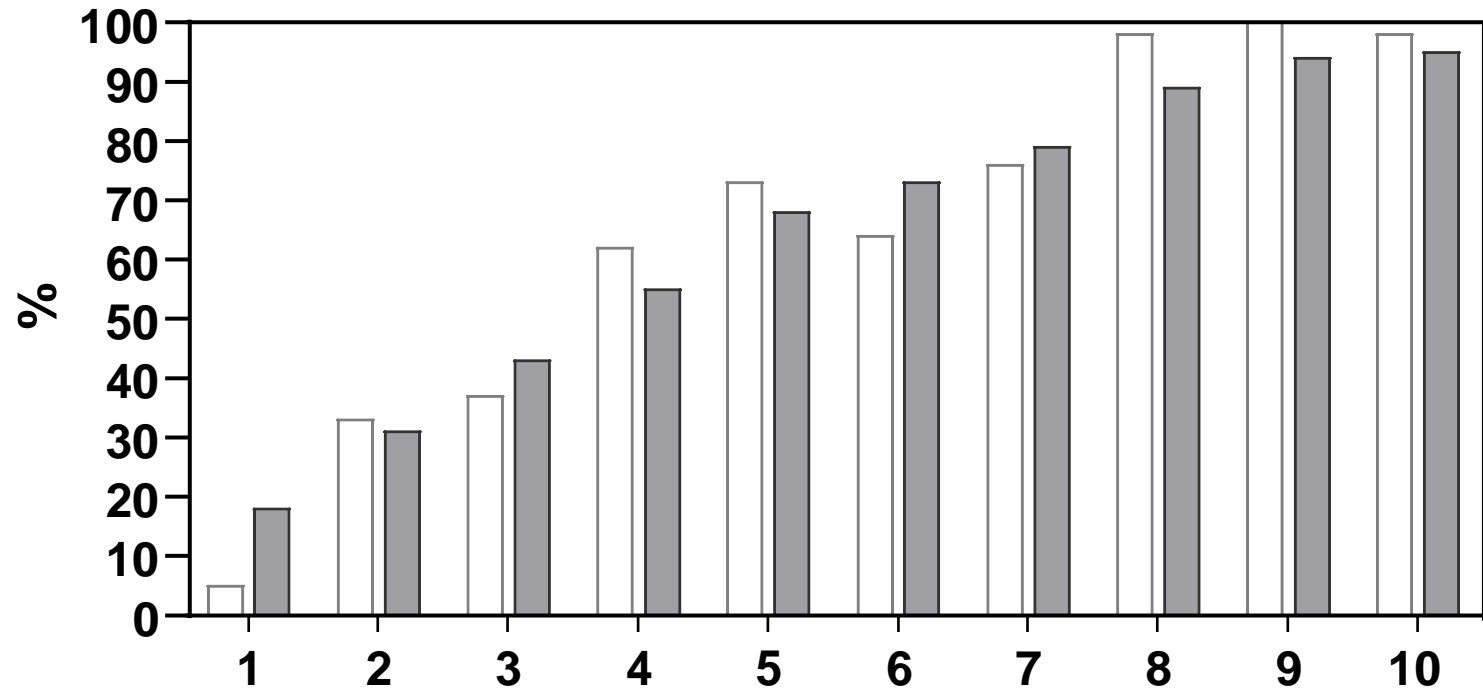

|          |           |           |           |           |           |           |           |           |           |           |
|----------|-----------|-----------|-----------|-----------|-----------|-----------|-----------|-----------|-----------|-----------|
| <b>N</b> | <b>40</b> | <b>42</b> | <b>41</b> | <b>42</b> | <b>41</b> | <b>42</b> | <b>41</b> | <b>42</b> | <b>41</b> | <b>41</b> |
|----------|-----------|-----------|-----------|-----------|-----------|-----------|-----------|-----------|-----------|-----------|

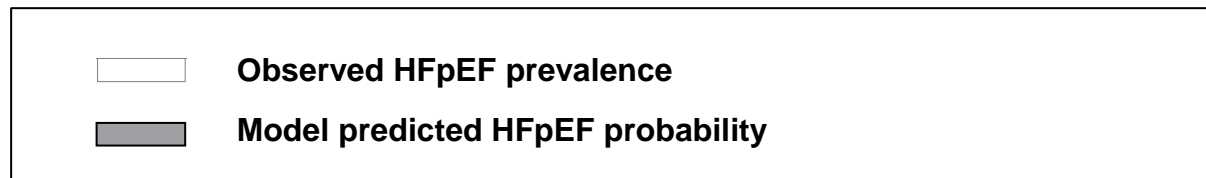

Supplemental Figure 3: Calibration of the Continuous score by Deciles of predicted probability



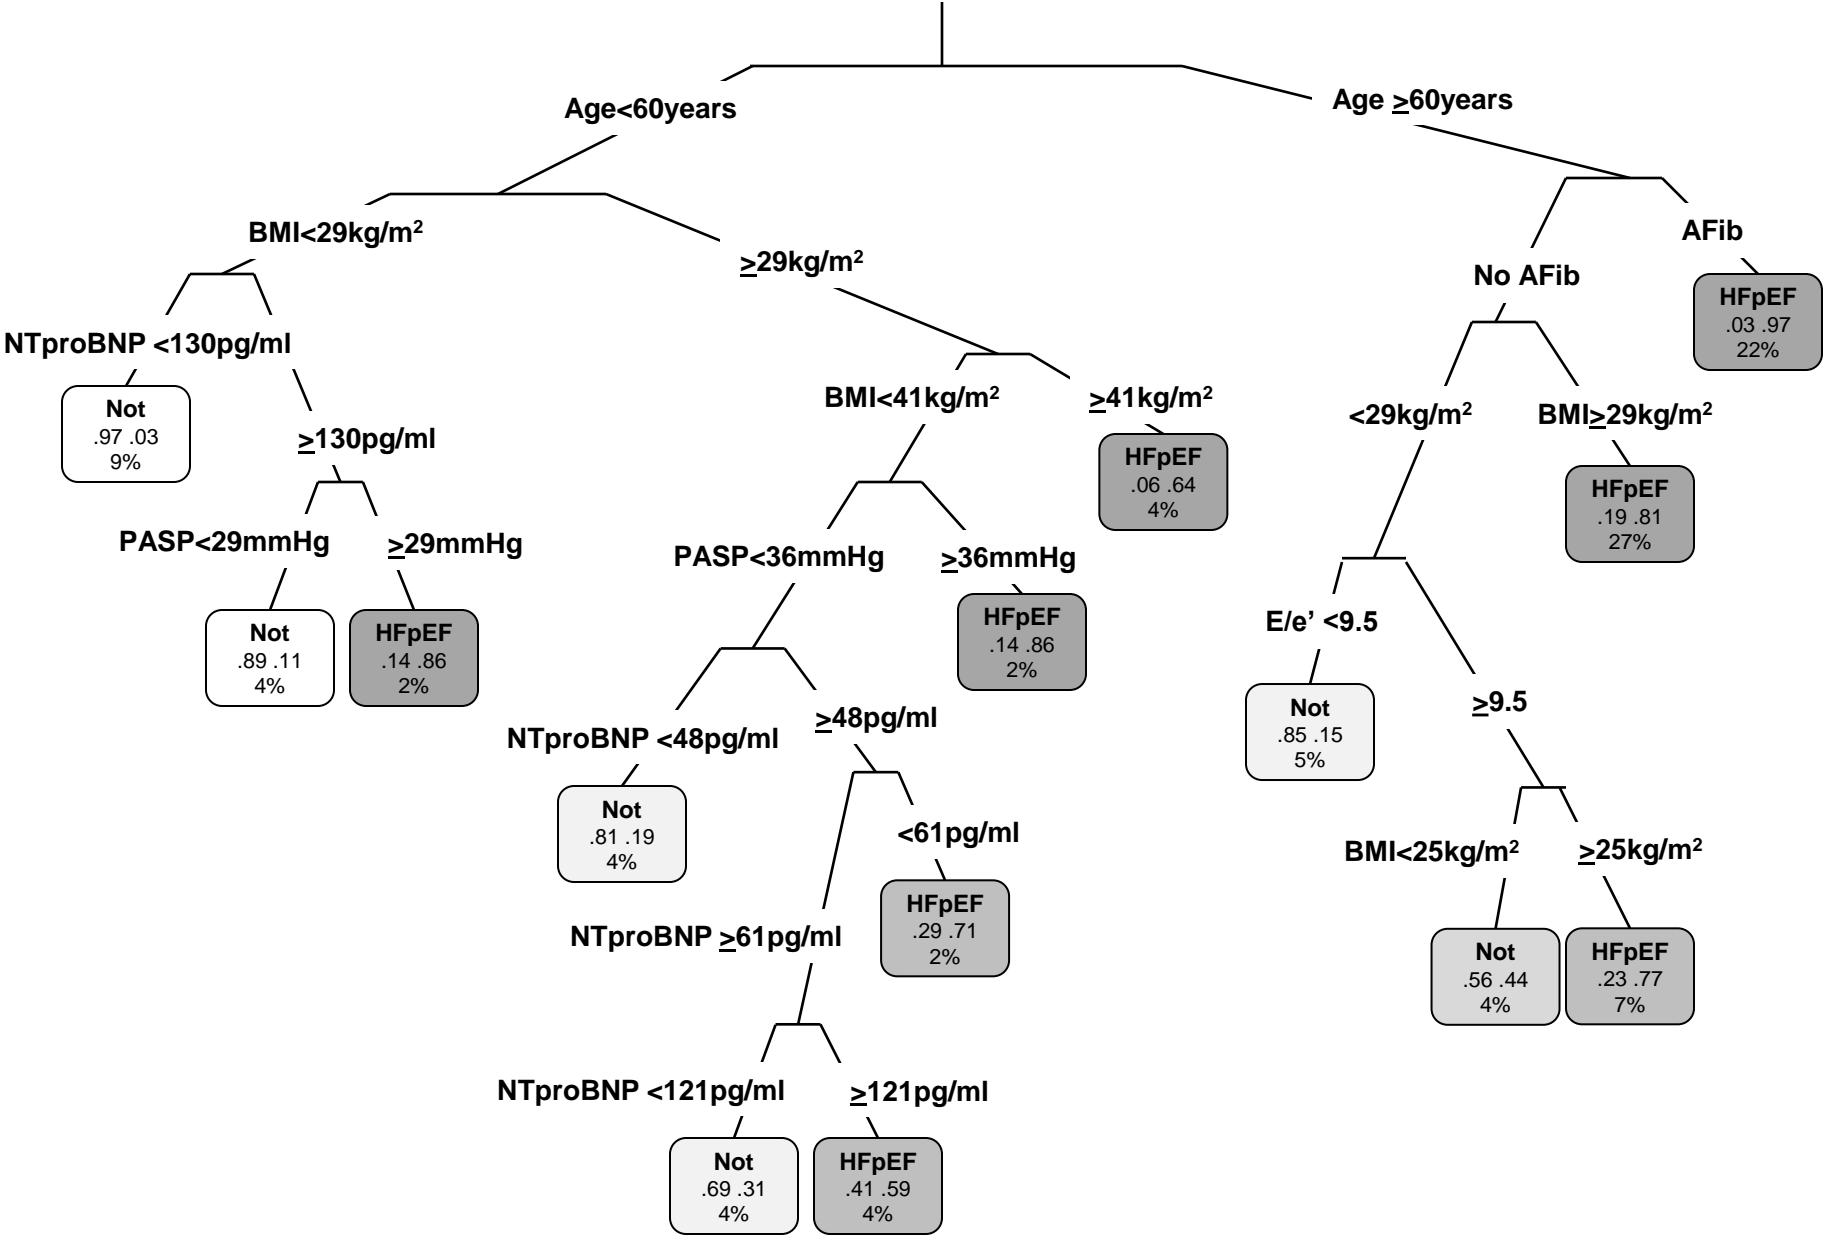

Supplemental Figure 4: Results of CART Analysis

### Local patients

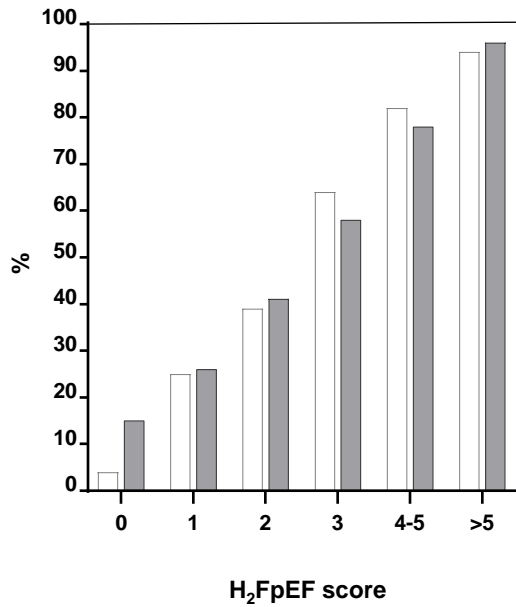

N 23 24 41 44 92 108

### Early HFpEF

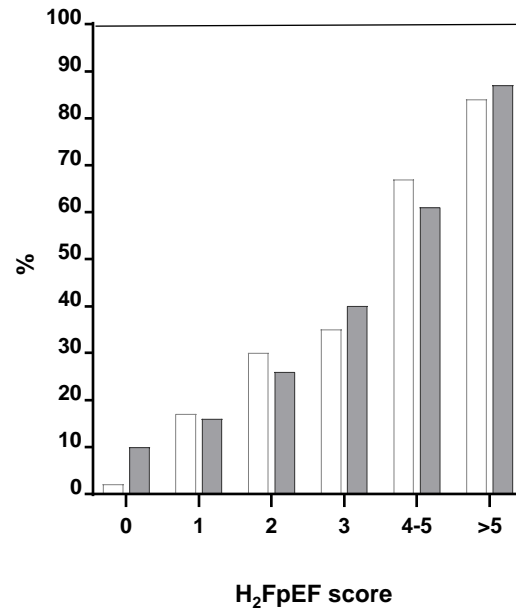

N 48 41 50 46 90 49

### Advanced HFpEF

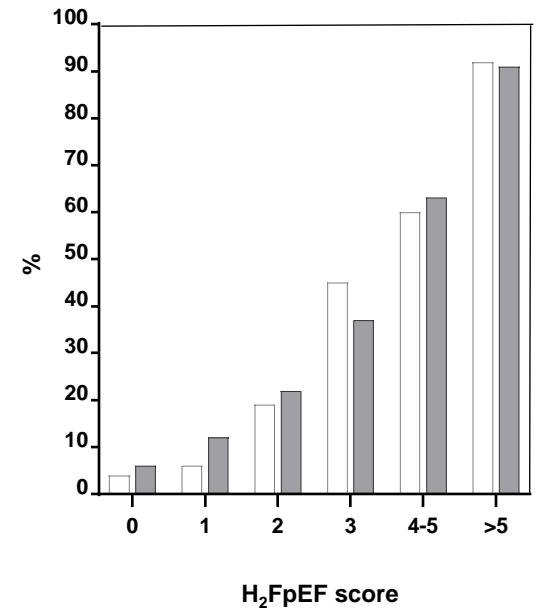

N 49 36 43 55 75 106

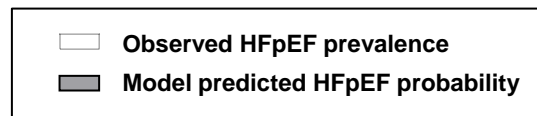

Supplemental Figure 5: Calibration of the points based H<sub>2</sub>FpEF score in subgroups
